# Supplementary material for: Density functional modelling of silicate and aluminosilicate dimerisation solution chemistry
Source: Royal Society of Chemistry journal article supplement (doi:10.1039/c0dt01042a), 2010-12-23
Supplement: c0dt01042a.pdf [file c0dt01042a.pdf]

NOTE: All coordinates are in Angstroms.

**pH 7 Geometric Coordinates**

| <b>H<sub>2</sub>O</b> | <b>Atom</b> | <b>x-coord</b> | <b>y-coord</b> | <b>z-coord</b> |
|-----------------------|-------------|----------------|----------------|----------------|
|                       | O           | -0.675         | 0.557          | 0.017          |
|                       | H           | -0.956         | 1.217          | 0.675          |
|                       | H           | 0.297          | 0.593          | 0.047          |

  

| <b>NaOH•3H<sub>2</sub>O</b> | <b>Atom</b> | <b>x-coord</b> | <b>y-coord</b> | <b>z-coord</b> |
|-----------------------------|-------------|----------------|----------------|----------------|
|                             | Na          | -0.179         | -0.947         | 1.016          |
|                             | O           | -2.012         | -0.353         | -0.002         |
|                             | H           | -2.848         | -0.507         | 0.477          |
|                             | O           | -1.972         | 2.233          | -0.563         |
|                             | H           | -2.336         | 2.304          | -1.465         |
|                             | H           | -2.007         | 1.227          | -0.356         |
|                             | O           | 1.651          | -1.649         | 2.207          |
|                             | H           | 2.105          | -1.040         | 2.822          |
|                             | H           | 1.618          | -2.497         | 2.692          |
|                             | O           | -2.312         | -1.510         | -2.363         |
|                             | H           | -2.203         | -1.085         | -1.433         |
|                             | H           | -2.105         | -2.453         | -2.222         |

  

| <b>Si(OH)<sub>4</sub></b> | <b>Atom</b> | <b>x-coord</b> | <b>y-coord</b> | <b>z-coord</b> |
|---------------------------|-------------|----------------|----------------|----------------|
|                           | Si          | -1.462         | 0.579          | 1.253          |
|                           | O           | -0.546         | -0.720         | 1.723          |
|                           | O           | -0.882         | 2.053          | 1.740          |
|                           | O           | -2.955         | 0.392          | 1.948          |
|                           | O           | -1.463         | 0.588          | -0.405         |
|                           | H           | 0.332          | -0.793         | 1.303          |
|                           | H           | -3.387         | -0.468         | 1.784          |
|                           | H           | -1.900         | 1.354          | -0.825         |
|                           | H           | -0.898         | 2.221          | 2.701          |

  

| <b>Si(OH)<sub>4</sub>•3H<sub>2</sub>O</b> | <b>Atom</b> | <b>x-coord</b> | <b>y-coord</b> | <b>z-coord</b> |
|-------------------------------------------|-------------|----------------|----------------|----------------|
|                                           | Si          | -1.506         | 0.474          | 1.315          |
|                                           | O           | -0.596         | -0.838         | 1.732          |
|                                           | O           | -1.053         | 1.888          | 2.076          |
|                                           | O           | -3.040         | 0.285          | 1.900          |
|                                           | O           | -1.393         | 0.608          | -0.336         |
|                                           | H           | 0.264          | -1.004         | 1.238          |
|                                           | H           | -3.523         | -0.495         | 1.568          |
|                                           | H           | -1.804         | 1.408          | -0.717         |
|                                           | H           | -0.184         | 2.244          | 1.808          |
|                                           | O           | -1.389         | 2.629          | 4.884          |
|                                           | H           | -1.318         | 2.374          | 3.935          |
|                                           | H           | -2.241         | 3.103          | 4.935          |
|                                           | O           | -1.422         | -3.187         | 3.203          |
|                                           | H           | -1.293         | -2.976         | 4.148          |
|                                           | H           | -1.145         | -2.363         | 2.736          |
|                                           | O           | 1.761          | -1.323         | 0.476          |
|                                           | H           | 2.368          | -1.695         | 1.148          |
|                                           | H           | 1.638          | -2.055         | -0.162         |

  

| <b>SiO(OH)<sub>3</sub>•Na<sup>+</sup>•3H<sub>2</sub>O</b> | <b>Atom</b> | <b>x-coord</b> | <b>y-coord</b> | <b>z-coord</b> |
|-----------------------------------------------------------|-------------|----------------|----------------|----------------|
|                                                           | O           | -1.206         | 0.301          | -0.342         |
|                                                           | H           | -1.735         | -0.519         | -0.334         |
|                                                           | Si          | -1.355         | 1.184          | -1.769         |

|    |        |        |        |
|----|--------|--------|--------|
| O  | -0.732 | 2.692  | -1.369 |
| O  | -0.297 | 0.594  | -2.931 |
| O  | -2.844 | 1.179  | -2.372 |
| H  | -1.192 | 3.127  | -0.627 |
| H  | 0.624  | 0.502  | -2.623 |
| O  | -4.431 | -0.700 | -3.460 |
| H  | -3.686 | -0.141 | -3.069 |
| H  | -4.073 | -1.052 | -4.298 |
| O  | -5.240 | 1.795  | -1.324 |
| H  | -5.504 | 1.182  | -0.611 |
| H  | -4.275 | 1.571  | -1.521 |
| O  | -3.993 | 2.525  | -4.390 |
| H  | -3.402 | 2.144  | -3.664 |
| H  | -4.003 | 3.489  | -4.231 |
| Na | -5.771 | 1.236  | -3.546 |

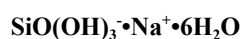

| Atom | x-coord | y-coord | z-coord |
|------|---------|---------|---------|
| Si   | -0.821  | 0.047   | 1.933   |
| O    | -1.121  | -0.524  | 3.487   |
| O    | -0.309  | 1.556   | 1.822   |
| O    | -2.301  | -0.105  | 1.145   |
| O    | 0.243   | -1.106  | 1.306   |
| H    | -0.388  | -0.395  | 4.118   |
| H    | -2.627  | -1.017  | 1.029   |
| H    | 0.642   | -0.859  | 0.450   |
| O    | -2.084  | 3.628   | 1.488   |
| H    | -1.552  | 2.806   | 1.710   |
| H    | -2.734  | 3.277   | 0.829   |
| O    | -3.720  | 1.991   | -0.227  |
| H    | -4.637  | 1.990   | 0.112   |
| H    | -3.298  | 1.214   | 0.218   |
| O    | 0.998   | 3.702   | 2.847   |
| H    | 0.694   | 3.956   | 3.739   |
| H    | 0.577   | 2.808   | 2.674   |
| O    | -3.590  | -0.832  | 4.929   |
| H    | -3.943  | 0.064   | 5.091   |
| H    | -2.761  | -0.673  | 4.416   |
| O    | 0.640   | 2.839   | -0.366  |
| H    | 0.357   | 2.210   | 0.368   |
| H    | 1.599   | 2.688   | -0.474  |
| O    | 2.302   | -2.476  | 2.791   |
| H    | 1.575   | -2.026  | 2.299   |
| H    | 1.973   | -3.387  | 2.912   |
| Na   | -0.054  | 4.658   | 0.950   |

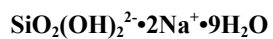

| Atom | x-coord | y-coord | z-coord |
|------|---------|---------|---------|
| O    | -3.224  | 1.026   | -0.202  |
| Si   | -1.779  | 1.495   | 0.384   |
| O    | -0.504  | 1.166   | -0.559  |
| O    | -1.852  | 3.188   | 0.712   |
| O    | -1.459  | 0.823   | 1.908   |
| H    | -2.566  | 3.624   | 0.211   |
| H    | -2.175  | 0.995   | 2.574   |
| Na   | 1.190   | 0.321   | -3.016  |
| O    | -0.822  | -0.727  | -2.446  |
| H    | -0.820  | -0.085  | -1.661  |
| H    | -1.718  | -0.584  | -2.827  |

|    |        |        |        |
|----|--------|--------|--------|
| O  | 0.456  | 2.521  | -2.631 |
| H  | -0.249 | 2.872  | -3.207 |
| H  | -0.025 | 2.152  | -1.813 |
| O  | 1.903  | 0.069  | -0.775 |
| H  | 2.614  | 0.652  | -0.448 |
| H  | 1.042  | 0.512  | -0.478 |
| Na | -5.698 | -0.304 | -1.528 |
| O  | -4.463 | -1.308 | 0.201  |
| H  | -3.894 | -0.468 | 0.216  |
| H  | -4.882 | -1.350 | 1.082  |
| O  | -5.739 | 1.832  | -0.512 |
| H  | -6.217 | 1.910  | 0.335  |
| H  | -4.768 | 1.685  | -0.256 |
| O  | -3.664 | 0.166  | -2.660 |
| H  | -3.706 | 0.906  | -3.296 |
| H  | -3.366 | 0.587  | -1.774 |
| O  | 0.568  | 2.166  | 3.458  |
| H  | -0.026 | 1.621  | 2.882  |
| H  | 0.006  | 2.949  | 3.641  |
| O  | -1.826 | 3.965  | 3.370  |
| H  | -2.176 | 4.867  | 3.503  |
| H  | -1.864 | 3.804  | 2.384  |
| O  | -3.256 | 1.628  | 3.959  |
| H  | -4.182 | 1.703  | 3.655  |
| H  | -2.888 | 2.547  | 3.867  |

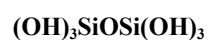

| Atom | x-coord | y-coord | z-coord |
|------|---------|---------|---------|
| Si   | -1.237  | 0.330   | 1.098   |
| O    | 0.104   | -0.424  | 1.707   |
| O    | -1.277  | 1.971   | 1.338   |
| O    | -2.544  | -0.333  | 1.857   |
| O    | -1.311  | 0.149   | -0.542  |
| H    | 0.945   | -0.225  | 1.252   |
| H    | -2.532  | -1.304  | 1.964   |
| H    | -1.138  | 2.277   | 2.255   |
| Si   | -1.306  | 1.105   | -1.892  |
| O    | -0.687  | 2.603   | -1.539  |
| O    | -0.400  | 0.441   | -3.105  |
| O    | -2.876  | 1.120   | -2.410  |
| H    | -0.842  | 2.884   | -0.613  |
| H    | -3.055  | 1.654   | -3.207  |
| H    | 0.566   | 0.463   | -2.966  |

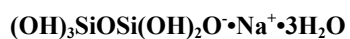

| Atom | x-coord | y-coord | z-coord |
|------|---------|---------|---------|
| Si   | -1.615  | 0.282   | 1.837   |
| O    | -0.021  | 0.486   | 1.915   |
| O    | -2.521  | 1.158   | 2.937   |
| O    | -2.089  | -1.315  | 2.035   |
| O    | -2.256  | 0.826   | 0.385   |
| H    | -1.395  | -1.958  | 1.799   |
| H    | -2.329  | 0.938   | 3.868   |
| Si   | -1.776  | 1.317   | -1.106  |
| O    | -1.206  | 2.877   | -0.883  |
| O    | -0.662  | 0.335   | -1.824  |
| O    | -3.043  | 1.268   | -2.173  |
| H    | -0.919  | 3.317   | -1.708  |
| H    | 0.179   | 0.189   | -1.308  |

|    |        |        |        |
|----|--------|--------|--------|
| H  | -3.801 | 1.837  | -1.943 |
| O  | 0.939  | 2.954  | 1.224  |
| H  | 0.474  | 2.135  | 1.576  |
| H  | 0.390  | 3.179  | 0.440  |
| O  | 2.475  | 0.555  | 3.015  |
| H  | 2.552  | 1.060  | 3.847  |
| H  | 1.492  | 0.459  | 2.859  |
| O  | 1.530  | -0.030 | -0.143 |
| H  | 0.899  | 0.005  | 0.663  |
| H  | 1.846  | -0.954 | -0.196 |
| Na | 2.862  | 1.629  | 0.949  |

| <b>(OH)<sub>2</sub>O<sup>-</sup>SiOSi(OH)<sub>2</sub>O<sup>-</sup>•2Na<sup>+</sup>•6H<sub>2</sub>O</b> | <b>Atom</b> | <b>x-coord</b> | <b>y-coord</b> | <b>z-coord</b> |
|--------------------------------------------------------------------------------------------------------|-------------|----------------|----------------|----------------|
|                                                                                                        | Si          | -1.820         | 0.053          | 1.798          |
|                                                                                                        | O           | -0.268         | 0.263          | 2.180          |
|                                                                                                        | O           | -2.923         | 0.668          | 2.903          |
|                                                                                                        | O           | -2.226         | -1.573         | 1.634          |
|                                                                                                        | O           | -2.273         | 0.856          | 0.413          |
|                                                                                                        | H           | -1.464         | -2.142         | 1.421          |
|                                                                                                        | H           | -2.839         | 0.277          | 3.792          |
|                                                                                                        | Si          | -1.673         | 1.354          | -1.056         |
|                                                                                                        | O           | -0.974         | 2.857          | -0.678         |
|                                                                                                        | O           | -0.472         | 0.323          | -1.598         |
|                                                                                                        | O           | -2.823         | 1.460          | -2.173         |
|                                                                                                        | H           | -0.565         | 3.294          | -1.450         |
|                                                                                                        | H           | 0.306          | 0.219          | -0.993         |
|                                                                                                        | O           | -4.064         | -0.395         | -3.660         |
|                                                                                                        | H           | -3.469         | 0.149          | -3.051         |
|                                                                                                        | H           | -3.456         | -0.844         | -4.278         |
|                                                                                                        | O           | 0.635          | 2.825          | 1.732          |
|                                                                                                        | H           | 0.183          | 1.968          | 1.996          |
|                                                                                                        | H           | 0.205          | 3.013          | 0.863          |
|                                                                                                        | O           | -5.355         | 2.341          | -2.132         |
|                                                                                                        | H           | -5.921         | 1.820          | -1.531         |
|                                                                                                        | H           | -4.412         | 2.031          | -1.941         |
|                                                                                                        | O           | 2.021          | 0.395          | 3.639          |
|                                                                                                        | H           | 1.937          | 0.864          | 4.491          |
|                                                                                                        | H           | 1.081          | 0.266          | 3.319          |
|                                                                                                        | O           | -3.013         | 2.697          | -4.545         |
|                                                                                                        | H           | -2.772         | 2.340          | -3.630         |
|                                                                                                        | H           | -3.001         | 3.669          | -4.450         |
|                                                                                                        | O           | 1.591          | -0.031         | 0.343          |
|                                                                                                        | H           | 0.843          | -0.073         | 1.042          |
|                                                                                                        | H           | 1.945          | -0.940         | 0.277          |
|                                                                                                        | Na          | -5.090         | 1.604          | -4.352         |
|                                                                                                        | Na          | 2.644          | 1.603          | 1.708          |

### pH 11 Geometric Coordinates

| <b>H<sub>2</sub>O</b> | <b>Atom</b> | <b>x-coord</b> | <b>y-coord</b> | <b>z-coord</b> |
|-----------------------|-------------|----------------|----------------|----------------|
|                       | O           | -0.678         | 0.554          | 0.014          |
|                       | H           | -0.954         | 1.218          | 0.676          |
|                       | H           | 0.297          | 0.596          | 0.049          |

| <b>NaOH•3H<sub>2</sub>O</b>                               | <b>Atom</b> | <b>x-coord</b> | <b>y-coord</b> | <b>z-coord</b> |
|-----------------------------------------------------------|-------------|----------------|----------------|----------------|
|                                                           | Na          | -0.318         | 0.045          | -1.907         |
|                                                           | O           | -2.315         | -0.536         | 0.117          |
|                                                           | H           | -2.986         | -0.730         | 0.797          |
|                                                           | O           | -1.475         | 1.761          | -0.769         |
|                                                           | H           | -2.166         | 2.232          | -1.273         |
|                                                           | H           | -1.961         | 0.972          | -0.317         |
|                                                           | O           | 0.213          | -1.148         | 0.065          |
|                                                           | H           | -0.779         | -0.979         | 0.289          |
|                                                           | H           | 0.715          | -0.657         | 0.744          |
|                                                           | O           | -2.247         | -1.221         | -2.389         |
|                                                           | H           | -2.442         | -1.088         | -1.385         |
|                                                           | H           | -2.123         | -2.183         | -2.501         |
| <b>Si(OH)<sub>4</sub></b>                                 | <b>Atom</b> | <b>x-coord</b> | <b>y-coord</b> | <b>z-coord</b> |
|                                                           | Si          | -1.462         | 0.579          | 1.253          |
|                                                           | O           | -0.546         | -0.720         | 1.723          |
|                                                           | O           | -0.882         | 2.053          | 1.740          |
|                                                           | O           | -2.955         | 0.392          | 1.948          |
|                                                           | O           | -1.463         | 0.588          | -0.405         |
|                                                           | H           | 0.332          | -0.793         | 1.303          |
|                                                           | H           | -3.387         | -0.468         | 1.784          |
|                                                           | H           | -1.900         | 1.354          | -0.824         |
|                                                           | H           | -0.898         | 2.221          | 2.701          |
| <b>Si(OH)<sub>4</sub>•3H<sub>2</sub>O</b>                 | <b>Atom</b> | <b>x-coord</b> | <b>y-coord</b> | <b>z-coord</b> |
|                                                           | Si          | -1.506         | 0.474          | 1.315          |
|                                                           | O           | -0.597         | -0.838         | 1.732          |
|                                                           | O           | -1.053         | 1.888          | 2.077          |
|                                                           | O           | -3.040         | 0.285          | 1.900          |
|                                                           | O           | -1.393         | 0.608          | -0.336         |
|                                                           | H           | 0.263          | -1.004         | 1.238          |
|                                                           | H           | -3.522         | -0.495         | 1.568          |
|                                                           | H           | -1.803         | 1.407          | -0.719         |
|                                                           | H           | -0.184         | 2.243          | 1.809          |
|                                                           | O           | -1.389         | 2.629          | 4.885          |
|                                                           | H           | -1.319         | 2.373          | 3.936          |
|                                                           | H           | -2.241         | 3.103          | 4.935          |
|                                                           | O           | -1.423         | -3.187         | 3.203          |
|                                                           | H           | -1.293         | -2.976         | 4.148          |
|                                                           | H           | -1.145         | -2.363         | 2.736          |
|                                                           | O           | 1.762          | -1.323         | 0.476          |
|                                                           | H           | 2.368          | -1.696         | 1.148          |
|                                                           | H           | 1.637          | -2.054         | -0.162         |
| <b>SiO(OH)<sub>3</sub>•Na<sup>+</sup>•3H<sub>2</sub>O</b> | <b>Atom</b> | <b>x-coord</b> | <b>y-coord</b> | <b>z-coord</b> |
|                                                           | O           | -1.206         | 0.302          | -0.341         |
|                                                           | H           | -1.737         | -0.517         | -0.332         |
|                                                           | Si          | -1.355         | 1.184          | -1.769         |
|                                                           | O           | -0.732         | 2.692          | -1.371         |
|                                                           | O           | -0.297         | 0.593          | -2.930         |
|                                                           | O           | -2.845         | 1.178          | -2.372         |
|                                                           | H           | -1.192         | 3.128          | -0.629         |
|                                                           | H           | 0.624          | 0.503          | -2.621         |
|                                                           | O           | -4.432         | -0.699         | -3.461         |
|                                                           | H           | -3.688         | -0.141         | -3.068         |
|                                                           | H           | -4.071         | -1.052         | -4.297         |

|    |        |       |        |
|----|--------|-------|--------|
| O  | -5.240 | 1.794 | -1.324 |
| H  | -5.502 | 1.181 | -0.610 |
| H  | -4.275 | 1.571 | -1.522 |
| O  | -3.994 | 2.525 | -4.390 |
| H  | -3.402 | 2.143 | -3.665 |
| H  | -4.001 | 3.488 | -4.230 |
| Na | -5.772 | 1.237 | -3.547 |

| <b>SiO(OH)<sub>3</sub>•Na<sup>+</sup>•6H<sub>2</sub>O</b> | <b>Atom</b> | <b>x-coord</b> | <b>y-coord</b> | <b>z-coord</b> |
|-----------------------------------------------------------|-------------|----------------|----------------|----------------|
|                                                           | Si          | -1.260         | 0.103          | 1.928          |
|                                                           | O           | -1.679         | -0.346         | 3.474          |
|                                                           | O           | -0.471         | 1.494          | 1.775          |
|                                                           | O           | -2.687         | 0.139          | 1.053          |
|                                                           | O           | -0.351         | -1.241         | 1.351          |
|                                                           | H           | -0.948         | -0.678         | 4.065          |
|                                                           | H           | -3.013         | -0.773         | 0.860          |
|                                                           | H           | 0.146          | -1.041         | 0.533          |
|                                                           | O           | -1.136         | 3.781          | 0.512          |
|                                                           | H           | -1.042         | 2.842          | 0.873          |
|                                                           | H           | -1.181         | 3.680          | -0.460         |
|                                                           | O           | -2.784         | -2.695         | 0.455          |
|                                                           | H           | -3.147         | -3.272         | 1.157          |
|                                                           | H           | -1.852         | -2.535         | 0.732          |
|                                                           | O           | 0.270          | 3.380          | 3.553          |
|                                                           | H           | -0.485         | 3.765          | 4.042          |
|                                                           | H           | -0.110         | 2.590          | 3.054          |
|                                                           | O           | 0.303          | -1.407         | 5.136          |
|                                                           | H           | -0.164         | -2.088         | 5.659          |
|                                                           | H           | 0.812          | -1.926         | 4.451          |
|                                                           | O           | 1.908          | 2.318          | 0.819          |
|                                                           | H           | 1.100          | 1.821          | 1.161          |
|                                                           | H           | 2.660          | 1.967          | 1.334          |
|                                                           | O           | 1.582          | -2.568         | 2.958          |
|                                                           | H           | 0.906          | -2.191         | 2.335          |
|                                                           | H           | 1.430          | -3.533         | 2.927          |
|                                                           | Na          | 0.921          | 4.349          | 1.503          |

| <b>SiO<sub>2</sub>(OH)<sub>2</sub><sup>2-</sup>•2Na<sup>+</sup>•6H<sub>2</sub>O</b> | <b>Atom</b> | <b>x-coord</b> | <b>y-coord</b> | <b>z-coord</b> |
|-------------------------------------------------------------------------------------|-------------|----------------|----------------|----------------|
|                                                                                     | O           | -3.155         | 0.938          | -0.592         |
|                                                                                     | Si          | -1.529         | 1.358          | -0.301         |
|                                                                                     | O           | -0.706         | -0.045         | -0.311         |
|                                                                                     | O           | -1.035         | 2.362          | -1.587         |
|                                                                                     | O           | -1.397         | 2.273          | 1.037          |
|                                                                                     | H           | -1.024         | 1.895          | -2.443         |
|                                                                                     | H           | -3.750         | 1.709          | -0.544         |
|                                                                                     | Na          | 0.944          | -2.633         | -0.207         |
|                                                                                     | O           | -1.361         | -2.550         | 0.266          |
|                                                                                     | H           | -1.310         | -1.558         | 0.042          |
|                                                                                     | H           | -1.962         | -2.931         | -0.403         |
|                                                                                     | O           | 0.842          | -1.237         | -2.104         |
|                                                                                     | H           | 0.325          | -1.556         | -2.869         |
|                                                                                     | H           | 0.194          | -0.667         | -1.564         |
|                                                                                     | O           | 1.307          | -0.811         | 1.238          |
|                                                                                     | H           | 2.107          | -0.273         | 1.089          |
|                                                                                     | H           | 0.566          | -0.337         | 0.725          |
|                                                                                     | Na          | -1.118         | 3.947          | 3.590          |
|                                                                                     | O           | -2.649         | 2.176          | 3.374          |

|   |        |       |       |
|---|--------|-------|-------|
| H | -2.257 | 2.034 | 2.446 |
| H | -2.445 | 1.357 | 3.866 |
| O | 0.687  | 2.806 | 2.581 |
| H | 1.013  | 2.001 | 3.026 |
| H | 0.001  | 2.473 | 1.903 |
| O | -1.851 | 4.837 | 1.539 |
| H | -1.240 | 5.421 | 1.051 |
| H | -1.699 | 3.908 | 1.151 |

| <b>SiO<sub>2</sub>(OH)<sub>2</sub><sup>2-</sup>•2Na<sup>+</sup>•9H<sub>2</sub>O</b> | <b>Atom</b> | <b>x-coord</b> | <b>y-coord</b> | <b>z-coord</b> |
|-------------------------------------------------------------------------------------|-------------|----------------|----------------|----------------|
|                                                                                     | Si          | -0.578         | -0.095         | 2.256          |
|                                                                                     | O           | 0.607          | 0.706          | 3.138          |
|                                                                                     | O           | -1.230         | 0.823          | 1.085          |
|                                                                                     | O           | -1.614         | -0.747         | 3.324          |
|                                                                                     | O           | 0.321          | -1.368         | 1.475          |
|                                                                                     | H           | 1.312          | 1.136          | 2.590          |
|                                                                                     | H           | -0.146         | -1.681         | 0.676          |
|                                                                                     | O           | -3.461         | 0.823          | -0.367         |
|                                                                                     | H           | -2.675         | 0.633          | 0.247          |
|                                                                                     | H           | -3.517         | 0.049          | -0.960         |
|                                                                                     | O           | -1.822         | 3.422          | 1.089          |
|                                                                                     | H           | -2.568         | 3.623          | 1.685          |
|                                                                                     | H           | -1.579         | 2.454          | 1.284          |
|                                                                                     | O           | 2.760          | 1.760          | 1.589          |
|                                                                                     | H           | 3.488          | 1.881          | 2.230          |
|                                                                                     | H           | 2.938          | 0.867          | 1.179          |
|                                                                                     | O           | -0.281         | 1.568          | -1.285         |
|                                                                                     | H           | -0.468         | 1.206          | -0.352         |
|                                                                                     | H           | 0.554          | 2.067          | -1.204         |
|                                                                                     | O           | 2.884          | -0.797         | 0.489          |
|                                                                                     | H           | 1.992          | -1.056         | 0.851          |
|                                                                                     | H           | 3.519          | -1.346         | 0.989          |
|                                                                                     | Na          | -2.312         | 2.737          | -1.107         |
|                                                                                     | O           | 0.439          | -3.934         | 2.890          |
|                                                                                     | H           | -0.466         | -3.882         | 3.279          |
|                                                                                     | H           | 0.506          | -3.070         | 2.418          |
|                                                                                     | O           | -2.266         | -3.238         | 3.787          |
|                                                                                     | H           | -1.975         | -2.309         | 3.453          |
|                                                                                     | H           | -2.839         | -3.600         | 3.083          |
|                                                                                     | O           | -1.403         | -0.824         | 5.987          |
|                                                                                     | H           | -0.609         | -1.309         | 6.285          |
|                                                                                     | H           | -1.290         | -0.717         | 4.984          |
|                                                                                     | O           | -4.150         | -0.411         | 4.043          |
|                                                                                     | H           | -3.216         | -0.360         | 3.648          |
|                                                                                     | H           | -4.330         | 0.482          | 4.394          |
|                                                                                     | Na          | -3.354         | -2.047         | 5.536          |

| <b>SiO<sub>3</sub>(OH)<sup>3-</sup>•3Na<sup>+</sup>•12H<sub>2</sub>O</b> | <b>Atom</b> | <b>x-coord</b> | <b>y-coord</b> | <b>z-coord</b> |
|--------------------------------------------------------------------------|-------------|----------------|----------------|----------------|
|                                                                          | O           | -3.184         | 0.966          | -0.265         |
|                                                                          | Si          | -1.778         | 1.444          | 0.454          |
|                                                                          | O           | -0.501         | 1.233          | -0.561         |
|                                                                          | O           | -1.928         | 3.157          | 0.753          |
|                                                                          | O           | -1.525         | 0.766          | 1.921          |
|                                                                          | H           | -2.663         | 3.584          | 0.240          |
|                                                                          | Na          | 1.353          | 0.671          | -2.896         |
|                                                                          | O           | -0.662         | -0.489         | -2.581         |
|                                                                          | H           | -0.720         | 0.085          | -1.740         |

|    |        |        |        |
|----|--------|--------|--------|
| H  | -1.526 | -0.302 | -3.011 |
| O  | 0.455  | 2.809  | -2.372 |
| H  | -0.237 | 3.119  | -2.988 |
| H  | -0.047 | 2.273  | -1.633 |
| O  | 1.954  | 0.293  | -0.639 |
| H  | 2.600  | 0.910  | -0.245 |
| H  | 1.037  | 0.670  | -0.394 |
| Na | -5.595 | 0.064  | -1.883 |
| O  | -4.536 | -1.314 | -0.306 |
| H  | -3.915 | -0.530 | -0.116 |
| H  | -4.984 | -1.498 | 0.542  |
| O  | -5.488 | 2.049  | -0.548 |
| H  | -6.016 | 2.043  | 0.274  |
| H  | -4.547 | 1.674  | -0.286 |
| O  | -3.476 | 0.522  | -2.840 |
| H  | -3.426 | 1.353  | -3.352 |
| H  | -3.214 | 0.777  | -1.878 |
| Na | -0.992 | 0.207  | 4.854  |
| O  | -1.677 | -1.465 | 3.325  |
| H  | -1.642 | -0.736 | 2.613  |
| H  | -0.999 | -2.114 | 3.056  |
| O  | 0.619  | 1.136  | 3.408  |
| H  | 1.336  | 0.543  | 3.111  |
| H  | -0.115 | 1.043  | 2.697  |
| O  | -2.705 | 1.636  | 4.142  |
| H  | -2.554 | 2.613  | 4.103  |
| H  | -2.383 | 1.352  | 3.217  |
| O  | -2.205 | 4.336  | 3.275  |
| H  | -2.066 | 3.912  | 2.381  |
| H  | -1.313 | 4.621  | 3.551  |
| O  | 0.231  | 4.797  | -0.217 |
| H  | 0.465  | 4.268  | -1.015 |
| H  | -0.496 | 4.251  | 0.180  |
| O  | -4.103 | 4.496  | -0.537 |
| H  | -4.708 | 3.711  | -0.630 |
| H  | -3.871 | 4.735  | -1.456 |

| $(\text{OH})_3\text{SiOSi}(\text{OH})_3$ | Atom | x-coord | y-coord | z-coord |
|------------------------------------------|------|---------|---------|---------|
|                                          | Si   | -1.238  | 0.330   | 1.098   |
|                                          | O    | 0.104   | -0.424  | 1.707   |
|                                          | O    | -1.276  | 1.971   | 1.339   |
|                                          | O    | -2.544  | -0.333  | 1.857   |
|                                          | O    | -1.311  | 0.150   | -0.541  |
|                                          | H    | 0.945   | -0.226  | 1.252   |
|                                          | H    | -2.533  | -1.303  | 1.963   |
|                                          | H    | -1.137  | 2.277   | 2.256   |
|                                          | Si   | -1.306  | 1.105   | -1.892  |
|                                          | O    | -0.687  | 2.603   | -1.540  |
|                                          | O    | -0.400  | 0.441   | -3.104  |
|                                          | O    | -2.876  | 1.119   | -2.411  |
|                                          | H    | -0.843  | 2.884   | -0.614  |
|                                          | H    | -3.055  | 1.653   | -3.208  |
|                                          | H    | 0.566   | 0.464   | -2.966  |

| $(\text{OH})_3\text{SiOSi}(\text{OH})_2\text{O}^- \cdot \text{Na}^+ \cdot 3\text{H}_2\text{O}$ | Atom | x-coord | y-coord | z-coord |
|------------------------------------------------------------------------------------------------|------|---------|---------|---------|
|                                                                                                | Si   | -1.616  | 0.260   | 1.835   |
|                                                                                                | O    | -0.023  | 0.466   | 1.929   |



|    |        |        |        |
|----|--------|--------|--------|
| O  | -2.533 | 1.131  | 2.930  |
| O  | -2.094 | -1.337 | 2.029  |
| O  | -2.242 | 0.806  | 0.378  |
| H  | -1.414 | -1.984 | 1.766  |
| H  | -2.351 | 0.907  | 3.861  |
| Si | -1.758 | 1.309  | -1.107 |
| O  | -1.199 | 2.873  | -0.873 |
| O  | -0.634 | 0.338  | -1.824 |
| O  | -3.019 | 1.258  | -2.182 |
| H  | -0.922 | 3.321  | -1.696 |
| H  | 0.201  | 0.187  | -1.299 |
| H  | -3.781 | 1.822  | -1.952 |
| O  | 0.923  | 2.945  | 1.248  |
| H  | 0.463  | 2.123  | 1.597  |
| H  | 0.374  | 3.169  | 0.464  |
| O  | 2.468  | 0.554  | 3.042  |
| H  | 2.539  | 1.065  | 3.871  |
| H  | 1.487  | 0.453  | 2.882  |
| O  | 1.541  | -0.036 | -0.122 |
| H  | 0.905  | -0.003 | 0.681  |
| H  | 1.858  | -0.959 | -0.175 |
| Na | 2.855  | 1.633  | 0.976  |

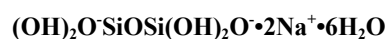

| <b>Atom</b> | <b>x-coord</b> | <b>y-coord</b> | <b>z-coord</b> |
|-------------|----------------|----------------|----------------|
| Si          | -1.816         | 0.044          | 1.792          |
| O           | -0.264         | 0.257          | 2.172          |
| O           | -2.919         | 0.640          | 2.905          |
| O           | -2.214         | -1.582         | 1.609          |
| O           | -2.274         | 0.863          | 0.417          |
| H           | -1.448         | -2.147         | 1.396          |
| H           | -2.844         | 0.227          | 3.785          |
| Si          | -1.677         | 1.364          | -1.051         |
| O           | -0.975         | 2.865          | -0.672         |
| O           | -0.479         | 0.334          | -1.600         |
| O           | -2.829         | 1.474          | -2.165         |
| H           | -0.566         | 3.302          | -1.443         |
| H           | 0.303          | 0.229          | -0.999         |
| O           | -4.053         | -0.392         | -3.652         |
| H           | -3.464         | 0.158          | -3.042         |
| H           | -3.439         | -0.837         | -4.268         |
| O           | 0.633          | 2.824          | 1.740          |
| H           | 0.182          | 1.965          | 1.998          |
| H           | 0.203          | 3.017          | 0.872          |
| O           | -5.367         | 2.339          | -2.129         |
| H           | -5.932         | 1.818          | -1.528         |
| H           | -4.423         | 2.036          | -1.934         |
| O           | 2.022          | 0.385          | 3.635          |
| H           | 1.936          | 0.846          | 4.491          |
| H           | 1.083          | 0.256          | 3.313          |
| O           | -3.020         | 2.710          | -4.537         |
| H           | -2.779         | 2.355          | -3.621         |
| H           | -3.013         | 3.682          | -4.443         |
| O           | 1.596          | -0.024         | 0.334          |
| H           | 0.848          | -0.070         | 1.033          |
| H           | 1.952          | -0.931         | 0.265          |
| Na          | -5.089         | 1.600          | -4.347         |
| Na          | 2.644          | 1.605          | 1.710          |

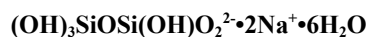

| Atom | x-coord | y-coord | z-coord |
|------|---------|---------|---------|
| Si   | -3.519  | -0.197  | -0.623  |
| O    | -3.179  | 0.720   | 0.775   |
| Si   | -1.908  | 0.752   | 1.807   |
| O    | -0.697  | -0.253  | 1.265   |
| O    | -2.293  | 0.316   | 3.367   |
| O    | -1.448  | 2.347   | 1.904   |
| O    | -1.969  | -0.609  | -1.238  |
| O    | -4.315  | 0.752   | -1.670  |
| O    | -4.252  | -1.576  | -0.207  |
| H    | -0.860  | -0.487  | 0.314   |
| H    | -2.419  | -0.641  | 3.506   |
| H    | -1.622  | 0.061   | -1.857  |
| H    | -0.732  | 2.530   | 2.542   |
| Na   | -6.430  | -3.781  | 0.066   |
| Na   | -6.137  | 2.156   | -3.771  |
| O    | -4.105  | -4.203  | 0.215   |
| H    | -3.737  | -4.425  | 1.092   |
| H    | -3.937  | -3.212  | 0.104   |
| O    | -6.801  | 0.273   | -2.471  |
| H    | -7.444  | 0.490   | -1.768  |
| H    | -5.882  | 0.365   | -2.033  |
| O    | -6.065  | -2.587  | -1.922  |
| H    | -6.590  | -1.812  | -2.224  |
| H    | -5.317  | -2.145  | -1.401  |
| O    | -4.155  | 1.029   | -4.325  |
| H    | -3.387  | 1.570   | -4.590  |
| H    | -4.026  | 0.852   | -3.336  |
| O    | -6.256  | -1.932  | 1.509   |
| H    | -5.484  | -1.617  | 0.928   |
| H    | -6.939  | -1.240  | 1.426   |
| O    | -5.267  | 3.232   | -1.860  |
| H    | -4.778  | 2.375   | -1.631  |
| H    | -4.566  | 3.900   | -1.984  |

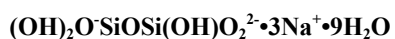

| Atom | x-coord | y-coord | z-coord |
|------|---------|---------|---------|
| Si   | -3.844  | -1.268  | -1.352  |
| O    | -2.303  | -0.941  | -0.736  |
| Si   | -1.441  | -1.652  | 0.503   |
| O    | -0.145  | -2.477  | 0.021   |
| O    | -2.536  | -2.599  | 1.359   |
| O    | -0.884  | -0.420  | 1.513   |
| O    | -3.665  | -2.518  | -2.488  |
| O    | -4.396  | 0.087   | -2.068  |
| O    | -4.797  | -1.881  | -0.173  |
| H    | -3.443  | -2.463  | 0.971   |
| H    | -3.078  | -2.282  | -3.229  |
| H    | -1.598  | 0.122   | 1.897   |
| Na   | -7.683  | -2.195  | 1.312   |
| Na   | -5.752  | 2.469   | -3.493  |
| Na   | 2.381   | -4.051  | -0.890  |
| O    | -6.291  | -3.974  | 0.632   |
| H    | -5.825  | -4.509  | 1.302   |
| H    | -5.596  | -3.339  | 0.269   |
| O    | -6.681  | 1.290   | -1.638  |
| H    | -6.672  | 1.798   | -0.804  |

|   |        |        |        |
|---|--------|--------|--------|
| H | -5.791 | 0.773  | -1.656 |
| O | 2.217  | -1.705 | -0.957 |
| H | 2.738  | -1.188 | -0.313 |
| H | 1.297  | -1.795 | -0.544 |
| O | -7.464 | -1.437 | -0.893 |
| H | -7.492 | -0.479 | -1.128 |
| H | -6.480 | -1.597 | -0.784 |
| O | -5.354 | 0.407  | -4.537 |
| H | -4.651 | 0.367  | -5.213 |
| H | -4.911 | 0.111  | -3.673 |
| O | 0.304  | -4.196 | -1.975 |
| H | -0.217 | -5.017 | -1.889 |
| H | -0.073 | -3.569 | -1.275 |
| O | -5.898 | -0.869 | 2.060  |
| H | -5.371 | -1.091 | 1.225  |
| H | -5.995 | 0.102  | 2.056  |
| O | -3.649 | 2.608  | -2.434 |
| H | -3.727 | 1.617  | -2.231 |
| H | -2.857 | 2.692  | -3.000 |
| O | 1.514  | -4.136 | 1.299  |
| H | 0.772  | -3.525 | 0.977  |
| H | 1.064  | -4.953 | 1.586  |

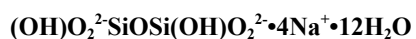

| <b>Atom</b> | <b>x-coord</b> | <b>y-coord</b> | <b>z-coord</b> |
|-------------|----------------|----------------|----------------|
| Na          | -0.869         | -3.011         | 0.288          |
| O           | -2.919         | -1.864         | 0.000          |
| H           | -2.310         | -1.040         | -0.094         |
| H           | -3.390         | -1.930         | -0.865         |
| O           | 0.306          | -1.776         | -1.345         |
| H           | 0.025          | -1.860         | -2.276         |
| H           | -0.183         | -0.954         | -0.991         |
| O           | -0.306         | -1.472         | 1.973          |
| H           | 0.639          | -1.328         | 2.170          |
| H           | -0.553         | -0.739         | 1.309          |
| Na          | 0.472          | 4.045          | 3.472          |
| O           | -1.819         | 3.984          | 2.967          |
| H           | -1.571         | 3.354          | 2.205          |
| H           | -2.430         | 3.474          | 3.532          |
| O           | 0.891          | 1.757          | 3.111          |
| H           | 0.443          | 1.111          | 3.691          |
| H           | 0.276          | 1.853          | 2.300          |
| O           | 0.932          | 4.589          | 1.232          |
| H           | 1.824          | 4.382          | 0.892          |
| H           | 0.360          | 3.780          | 0.989          |
| O           | -2.890         | 2.093          | -0.400         |
| Si          | -4.439         | 1.524          | -0.127         |
| O           | -4.961         | 0.710          | -1.462         |
| O           | -4.413         | 0.450          | 1.185          |
| O           | -5.431         | 2.756          | 0.247          |
| H           | -4.002         | -0.408         | 0.932          |
| Si          | -1.288         | 1.660          | -0.146         |
| O           | -1.125         | 0.035          | -0.050         |
| O           | -0.464         | 2.243          | -1.520         |
| O           | -0.670         | 2.487          | 1.114          |
| H           | -0.720         | 1.771          | -2.334         |
| Na          | -6.417         | -0.728         | -3.616         |
| O           | -5.904         | 1.609          | -3.716         |

|    |        |        |        |
|----|--------|--------|--------|
| H  | -5.417 | 1.399  | -2.834 |
| H  | -5.206 | 1.889  | -4.341 |
| O  | -4.350 | -1.509 | -2.610 |
| H  | -3.592 | -1.407 | -3.218 |
| H  | -4.436 | -0.603 | -2.114 |
| O  | -7.399 | -0.285 | -1.503 |
| H  | -7.499 | -1.052 | -0.905 |
| H  | -6.462 | 0.091  | -1.312 |
| Na | -8.126 | 4.245  | -0.485 |
| O  | -6.335 | 4.030  | -1.975 |
| H  | -5.872 | 3.542  | -1.215 |
| H  | -6.360 | 3.355  | -2.692 |
| O  | -8.034 | 2.033  | 0.286  |
| H  | -8.095 | 1.278  | -0.344 |
| H  | -7.031 | 2.192  | 0.343  |
| O  | -6.596 | 4.967  | 1.174  |
| H  | -6.861 | 4.889  | 2.110  |
| H  | -6.020 | 4.157  | 0.996  |

| $\text{Al(OH)}_4^- \cdot \text{Na}^+$ | Atom | x-coord | y-coord | z-coord |
|---------------------------------------|------|---------|---------|---------|
|                                       | O    | -1.698  | -0.204  | 0.471   |
|                                       | H    | -1.454  | 0.183   | 1.330   |
|                                       | Al   | -1.274  | 0.789   | -0.938  |
|                                       | O    | -1.441  | 2.500   | -0.493  |
|                                       | O    | 0.299   | 0.382   | -1.720  |
|                                       | O    | -2.234  | 0.256   | -2.365  |
|                                       | H    | -1.083  | 3.134   | -1.141  |
|                                       | H    | 1.109   | 0.433   | -1.187  |
|                                       | H    | -3.195  | 0.393   | -2.353  |
|                                       | Na   | -0.522  | -0.407  | -3.663  |

| $(\text{OH})_3\text{SiOAl(OH)}_3^- \cdot \text{Na}^+$ | Atom | x-coord | y-coord | z-coord |
|-------------------------------------------------------|------|---------|---------|---------|
|                                                       | Si   | -1.182  | -0.550  | 1.898   |
|                                                       | O    | 0.445   | -0.646  | 1.530   |
|                                                       | O    | -1.466  | 0.303   | 3.304   |
|                                                       | O    | -1.720  | -2.096  | 2.237   |
|                                                       | O    | -1.991  | 0.202   | 0.708   |
|                                                       | H    | -1.429  | -2.769  | 1.592   |
|                                                       | H    | -1.120  | -0.118  | 4.113   |
|                                                       | H    | 0.647   | -0.087  | 0.731   |
|                                                       | Al   | -1.453  | 0.928   | -0.822  |
|                                                       | O    | -2.188  | 2.522   | -0.955  |
|                                                       | O    | 0.369   | 0.904   | -0.826  |
|                                                       | O    | -1.614  | -0.150  | -2.240  |
|                                                       | H    | -2.129  | 2.947   | -1.829  |
|                                                       | H    | 0.817   | 1.751   | -0.654  |
|                                                       | H    | -2.492  | -0.476  | -2.497  |
|                                                       | Na   | 0.575   | -0.341  | -2.757  |

| $(\text{OH})_2\text{O}^-\text{SiOAl(OH)}_3^- \cdot 2\text{Na}^+ \cdot 3\text{H}_2\text{O}$ | Atom | x-coord | y-coord | z-coord |
|--------------------------------------------------------------------------------------------|------|---------|---------|---------|
|                                                                                            | Si   | -1.216  | -0.458  | 1.931   |
|                                                                                            | O    | 0.086   | 0.406   | 2.367   |
|                                                                                            | O    | -2.515  | -0.325  | 3.002   |
|                                                                                            | O    | -0.858  | -2.116  | 1.918   |
|                                                                                            | O    | -1.860  | -0.020  | 0.491   |
|                                                                                            | H    | 0.099   | -2.289  | 1.856   |
|                                                                                            | H    | -2.300  | -0.641  | 3.899   |

|    |        |        |        |
|----|--------|--------|--------|
| Al | -1.359 | 0.818  | -0.978 |
| O  | -1.493 | 2.577  | -0.666 |
| O  | 0.271  | 0.354  | -1.571 |
| O  | -2.217 | 0.250  | -2.444 |
| H  | -1.167 | 3.140  | -1.391 |
| H  | 1.010  | 0.449  | -0.932 |
| H  | -3.176 | 0.382  | -2.518 |
| O  | -0.176 | 3.080  | 1.742  |
| H  | -0.234 | 2.124  | 2.041  |
| H  | -0.615 | 3.039  | 0.845  |
| O  | 1.897  | 1.567  | 3.976  |
| H  | 1.504  | 2.009  | 4.753  |
| H  | 1.144  | 1.034  | 3.571  |
| O  | 2.104  | 0.784  | 0.708  |
| H  | 1.337  | 0.487  | 1.321  |
| H  | 2.808  | 0.118  | 0.828  |
| Na | 2.132  | 2.797  | 1.963  |
| Na | -0.393 | -0.549 | -3.521 |

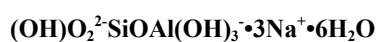

| Atom | x-coord | y-coord | z-coord |
|------|---------|---------|---------|
| Na   | -0.031  | -2.517  | 1.979   |
| O    | -2.118  | -2.216  | 0.879   |
| H    | -1.712  | -1.296  | 0.628   |
| H    | -2.164  | -2.713  | 0.039   |
| O    | 1.257   | -1.569  | 0.238   |
| H    | 1.247   | -2.026  | -0.625  |
| H    | 0.527   | -0.863  | 0.172   |
| O    | -0.239  | -0.439  | 3.051   |
| H    | 0.598   | 0.000   | 3.298   |
| H    | -0.463  | -0.078  | 2.120   |
| Na   | 0.821   | 5.219   | 1.311   |
| O    | -1.526  | 5.154   | 1.133   |
| H    | -1.398  | 4.172   | 0.877   |
| H    | -2.038  | 5.137   | 1.964   |
| O    | 1.053   | 3.129   | 2.375   |
| H    | 0.640   | 3.043   | 3.256   |
| H    | 0.343   | 2.806   | 1.712   |
| O    | 0.998   | 4.301   | -0.846  |
| H    | 1.825   | 3.831   | -1.066  |
| H    | 0.363   | 3.578   | -0.504  |
| O    | -3.118  | 1.521   | 0.419   |
| Al   | -4.571  | 0.695   | -0.157  |
| O    | -4.515  | 0.640   | -1.966  |
| O    | -4.834  | -0.883  | 0.608   |
| O    | -6.075  | 1.672   | -0.029  |
| H    | -4.006  | -1.379  | 0.785   |
| Si   | -1.529  | 1.414   | -0.018  |
| O    | -0.840  | 0.022   | 0.519   |
| O    | -1.608  | 1.354   | -1.739  |
| O    | -0.699  | 2.745   | 0.448   |
| H    | -0.769  | 1.074   | -2.147  |
| H    | -6.570  | 1.657   | 0.807   |
| H    | -3.605  | 0.843   | -2.267  |
| Na   | -6.366  | 1.929   | -2.258  |

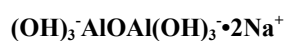

| Atom | x-coord | y-coord | z-coord |
|------|---------|---------|---------|
| O    | -1.185  | -0.545  | 0.618   |

|    |        |        |        |
|----|--------|--------|--------|
| Al | -0.883 | 0.616  | -0.637 |
| O  | -0.942 | 2.283  | 0.003  |
| O  | 0.644  | 0.272  | -1.556 |
| O  | -1.925 | 0.434  | -2.113 |
| H  | -0.754 | 2.969  | -0.663 |
| H  | 1.415  | -0.018 | -1.042 |
| H  | -2.825 | 0.798  | -2.075 |
| Al | -1.897 | -0.839 | 2.175  |
| O  | -3.667 | -0.489 | 2.349  |
| O  | -1.673 | -2.522 | 2.732  |
| O  | -1.379 | 0.356  | 3.444  |
| H  | -4.290 | -1.169 | 2.043  |
| H  | -0.859 | -2.941 | 2.401  |
| H  | -0.642 | 0.933  | 3.177  |
| Na | -0.294 | -0.089 | -3.565 |
| Na | -3.472 | 1.098  | 3.922  |
